# Supplementary material for: Rapid, Semiquantitative Assay To Discriminate among Compounds with Activity against Replicating or Nonreplicating Mycobacterium tuberculosis
Source: PubMed Central journal article supplement — Antimicrob Agents Chemother. 2015 Sep 18;59(10):6521–38. doi: 10.1128/AAC.00803-15 (PMC4576094; doi:10.1128/aac.00803-15), 2015-09-18

## SUPPLEMENT

### **Rapid, semi-quantitative assay to discriminate among compounds with activity against replicating or non-replicating *Mycobacterium tuberculosis***

Ben Gold<sup>1#</sup>, Julia Roberts<sup>1†</sup>, Yan Ling<sup>1†</sup>, Landys Lopez Quezada<sup>1</sup>, Jou Glasheen<sup>1</sup>, Elaine Ballinger<sup>1</sup>, Selin Somersan-Karakaya<sup>2</sup>, Thulasi Warriar<sup>1</sup>, J. David Warren<sup>3</sup>, Carl Nathan<sup>1</sup>

<sup>1</sup>Departments of Microbiology & Immunology, <sup>2</sup>Medicine, and <sup>3</sup>Milstein Chemistry Core Facility, Weill Cornell Medical College, New York, NY, 10065

† These authors contributed equally.

**Running title:** Charcoal agar resazurin assay (CARA) for Mycobacteria

# To whom correspondence should be addressed. E-mail: [bsg2001@med.cornell.edu](mailto:bsg2001@med.cornell.edu)

Department of Microbiology and Immunology, Weill Cornell Medical College, Belfer 1126, 413

East 69th Street, NY, NY 10065; Phone: 646-962-6209

## FIGURE LEGENDS, SUPPLEMENT:

**Fig. S1.** (a) The addition of 0.4% (wt/vol) activated charcoal to 7H9-glycerol liquid medium prior to autoclaving decolorizes the medium. (b) Evidence that activated charcoal binds Alamar blue in solution. Stationary-phase Msm in 7H9-glycerol liquid medium (200  $\mu$ L) at an OD<sub>580</sub> of 0.5 was mixed with 0 – 0.4% activated charcoal in a 96-well plate. Alamar blue:Tween 80 (in PBS) (1:1) (40  $\mu$ L) was added, and fluorescence allowed to develop, during 1 hour at room temperature. Data are means +/- standard deviation of quadruplicate wells. In some cases, error bars are obscured by data points. This is one of 3 experiments with similar results. Colonies arising from 10-fold serial dilutions of wild-type Mtb were observed at similar times when grown on (c) 7H11-OADC agar or (d) 7H11-OADC agar supplemented with 0.4% activated charcoal. Colonies were often smaller on 7H11-OADC-charcoal plates.

**Fig. S2.** Correlation between the numbers of inoculated Msm on CARA plates and Alamar blue fluorescence. CARA plates were incubated at 37 °C for either 24 (a) or 48 (b) hours. Points represent the average of 8 replicates +/- standard deviation. Graphs are representative examples of 2 independent experiments.

**Fig. S3.** Examples of compounds whose CFU counts were not significantly impacted by addition of activated charcoal to agar plates used to enumerate surviving bacilli. Inclusion of 0.4% (wt/vol) activated charcoal in 7H11-OADC agar plates had little impact on CFU counts for replicating and non-replicating wild-type Mtb treated with kanamycin (a and b) or moxifloxacin (c and d). Data are means +/- standard deviation for 1 (kanamycin) and 3 (moxifloxacin) experiments. Numbers

above data points are p-values (unpaired Student's t-test) compared to the DMSO-treated control, and color-coded (blue = no charcoal; red = plus charcoal; N.S. = not significant, \*  $P < 0.1$ , \*\*  $P < 0.05$ , \*\*\*  $P < 0.01$ ).

**Fig. S4:** Evidence that severely impaired time to recovery on 7H11-OADC agar plates is a plausible explanation for why some bacteriostatic antibiotics exhibiting a PAE, and bactericidal compounds, have similar R-CARA results. Wild-type Mtb was exposed to DMSO, PAS or fenamisol at the concentrations shown for 7 days under replicating conditions, and serial dilutions were spread on 7H11-OADC agar plates and incubated for three weeks at 37° C. Colonies were monitored for approximately 2 weeks after counting CFU's to determine if more colonies appeared at later time points. CFU counts in (a) were consistent with both PAS and fenamisol acting as bacteriostatic agents. (b) There was a dose-dependent decrease in colony size compared to colonies arising from DMSO-treated control cells. The dilutions shown between drug-treated and DMSO vehicle control are not identical and the plates were chosen to illustrate differences in colony size at three weeks. Data shown in (a) are means +/- standard deviations of three replicates and error bars are obscured by data points. N=1 experiment.

**Fig. S5.** Guidelines to determine the CARA-MBC<sub>≥99</sub>. The CARA-MBC<sub>≥99</sub> (a) is the lowest concentration of drug that results in AB fluorescence remaining at background levels. Although the CARA-MBC<sub>≥99</sub> may appear obvious when graphed (b), expanding the Y-axis may reveal a more accurate CARA-MBC<sub>≥99</sub> (c). The data are hypothetical.

**Fig. S6:** Guide to interpreting CARA results. Once accurately determined, the CARA-MBC<sub>≥99</sub> can then be compared with the standard liquid broth MIC to generate a hypothesis as to whether a replicating-active compound is bactericidal (**a**) or bacteriostatic (**b-d**). For some compounds, bacteriostasis requires the identification of a static window (SW) (**d**) that emerges as a > 4-fold shift between the MIC and CARA-MBC<sub>≥99</sub>. The example shown in (**e**) demonstrates a candidate non-replicating-active molecule whose NR-CARA suggests activity only at the highest drug concentrations tested; however, this can often be artefactual. In (**f**), a compound may exhibit higher potency by the CARA compared with the MIC<sub>90</sub> assay, although such cases are rare. The example in (**g**) demonstrates an application of the CARA to identify compounds with pure replicating activity and no non-replicating activity. In general, MIC to CARA-MBC<sub>≥99</sub> differences of 2-fold or lower are likely due to experimental variability. The data are hypothetical.

**Table S1.** Evidence that TMC207 and PA824 are carried over at growth inhibitory concentrations from liquid broth assays to 7H11-OADC agar plates, and inclusion of activated charcoal in the agar plates can mitigate this effect.

| drug   | concentration | 0.4% (wt/vol) charcoal in agar plate? | Fold dilution of test well contents in assay plate prior to spreading on agar plate |                       |            |
|--------|---------------|---------------------------------------|-------------------------------------------------------------------------------------|-----------------------|------------|
|        |               |                                       | no dilution                                                                         | 1:10                  | 1:100      |
| TMC207 | 30 µg/mL      | no                                    | 0, 0, 0                                                                             | 43, 48, 45            | 5, 10, 6   |
| TMC207 | 30 µg/mL      | yes                                   | too numerous to count                                                               | too numerous to count | 16, 19, 12 |
| PA824  | 30 µg/mL      | no                                    | 0, 2, 0                                                                             | 1, 0, 2               | 0, 0, 0    |
| PA824  | 30 µg/mL      | yes                                   | 25, 20, 24                                                                          | 1, 3, 1               | 0, 0, 0    |

Data presented are colony counts from replicating wild-type Mtb exposed to 30 µg/mL TMC207 and PA824 for 7 days. Results of triplicates are separated by commas. 10 µL were removed from a 200 µL assay volume from a liquid MIC assay plate in 96-well format and spread on a 7H11-OADC agar plate with or without 0.4% activated charcoal, directly (undiluted) or diluted 10- or 100-fold in 7H9-ADN medium prior to plating 10 µL. Each aliquot of 10 µL was spread onto 8 mL of 7H11-OADC agar in a Y-style petri plate, effectively diluting any residual drug 800-fold to 0.038 µg/mL. Similar trends, albeit less dramatic, were observed at 10 µg/mL for both drugs (**data not shown**). Representative bacterial counts of one experiment performed 4 times.

**Table S2.** Physicochemical properties of anti-Mycobacterial molecules. The data in the column, “% removed by 0.4% (wt/vol) activated charcoal”, was reproduced from **Table 2** to facilitate data analysis.

| Compound        | % removed by 0.4% (wt/vol) activated charcoal, 24 hours <sup>f</sup> | MW  | log P | HBD | HBA | pKa  | Heavy atoms | PSA (Å <sup>2</sup> ) | RB |
|-----------------|----------------------------------------------------------------------|-----|-------|-----|-----|------|-------------|-----------------------|----|
| streptomycin    | 41.7                                                                 | 582 | -7.65 | 14  | 19  | 11.9 | 40          | 331.4                 | 9  |
| ethambutol      | 97.2                                                                 | 204 | -0.06 | 4   | 4   | 9.6  | 14          | 64.5                  | 9  |
| PA-824          | ≥ 99.9                                                               | 359 | 4.14  | 0   | 6   | -3.4 | 25          | 91.3                  | 6  |
| rifampicin      | ≥ 99.9                                                               | 823 | 2.77  | 6   | 14  | 6.9  | 59          | 220.2                 | 5  |
| moxifloxacin    | ≥ 99.9                                                               | 401 | -0.5  | 2   | 7   | 9.4  | 29          | 82.1                  | 4  |
| oxyphenbutazone | ≥ 99.9                                                               | 324 | 3.83  | 1   | 3   | 4.9  | 24          | 60.9                  | 5  |
| ethionamide     | ≥ 99.9                                                               | 166 | 1.33  | 1   | 1   | 5.0  | 11          | 38.9                  | 2  |
| isoniazid       | ≥ 99.9                                                               | 137 | -0.69 | 2   | 3   | 3.4  | 10          | 68.0                  | 1  |
| TMC207          | ≥ 99.9                                                               | 556 | 7.13  | 1   | 4   | 8.9  | 37          | 45.6                  | 8  |
| linezolid       | ≥ 99.9                                                               | 337 | 0.64  | 1   | 5   | 14.5 | 24          | 71.1                  | 4  |
| PAS             | ≥ 99.9                                                               | 153 | 0.83  | 3   | 4   | 3.7  | 11          | 83.6                  | 1  |
| fenamisal       | ≥ 99.9                                                               | 243 | 3.22  | 2   | 3   | 9.9  | 18          | 72.6                  | 4  |
| nitazoxanide    | ≥ 99.9                                                               | 307 | 2.12  | 1   | 5   | 8.2  | 21          | 114.1                 | 5  |

PSA, polar surface area; HBD, H-bond donor; HBA, H-bond acceptor; RB, rotatable bonds

Figure S1

a)

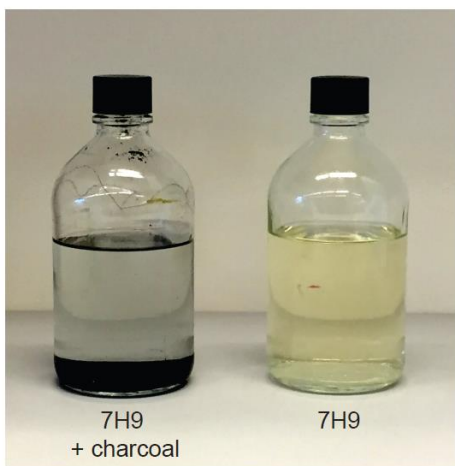

b)

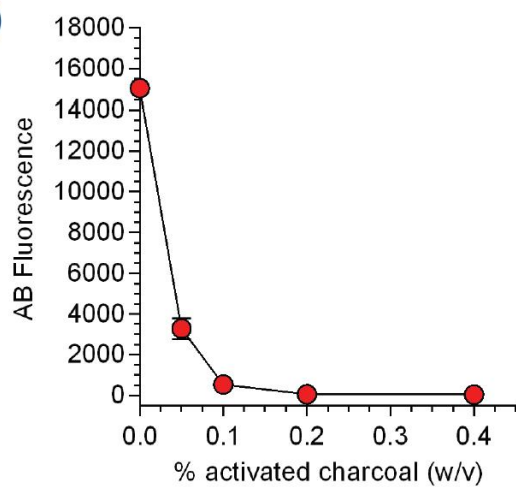

c)

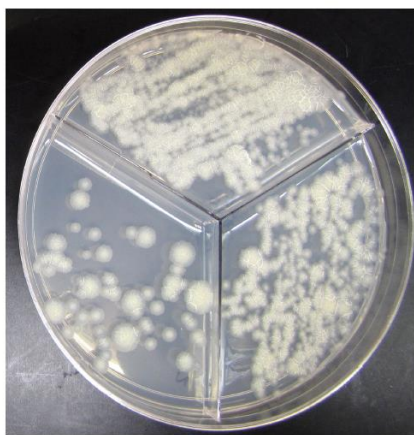

7H11-OADC

d)

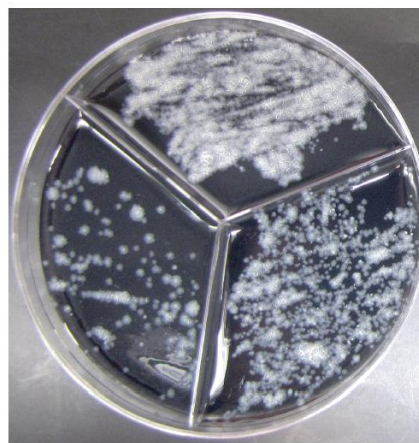

7H11-OADC-charcoal

**Figure S2**

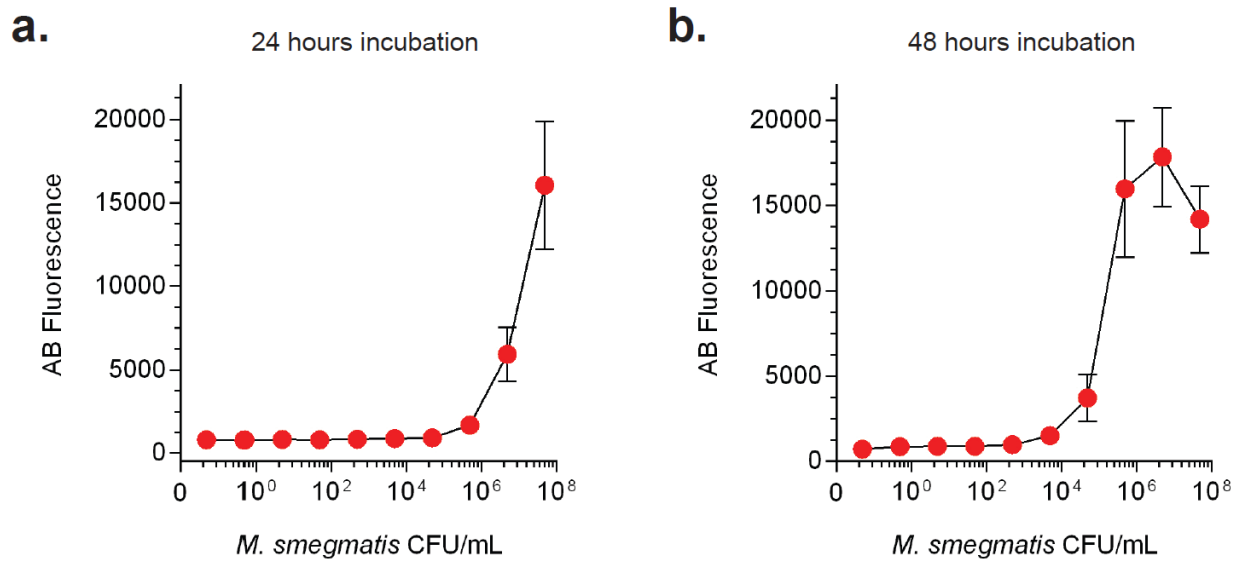



Figure S3

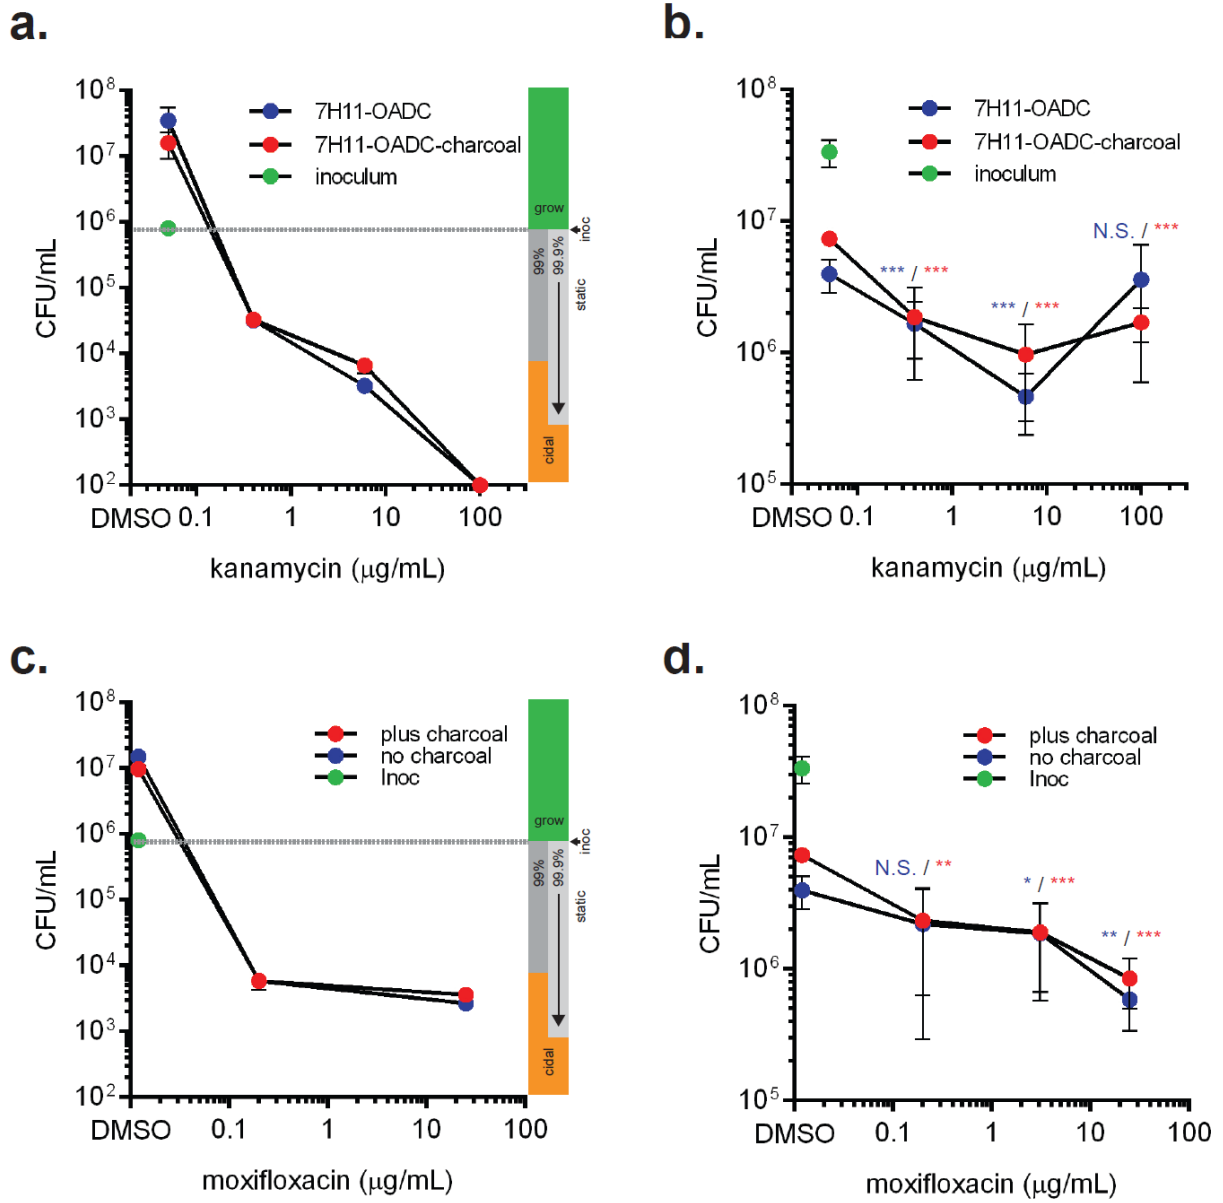

Figure S4

a.

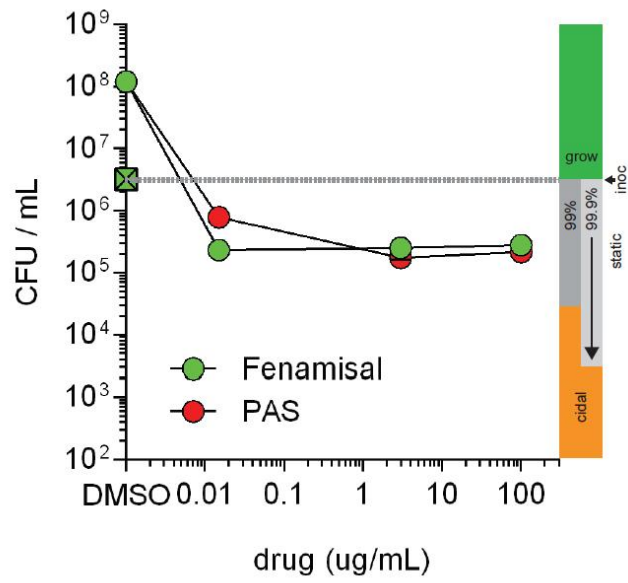

b.

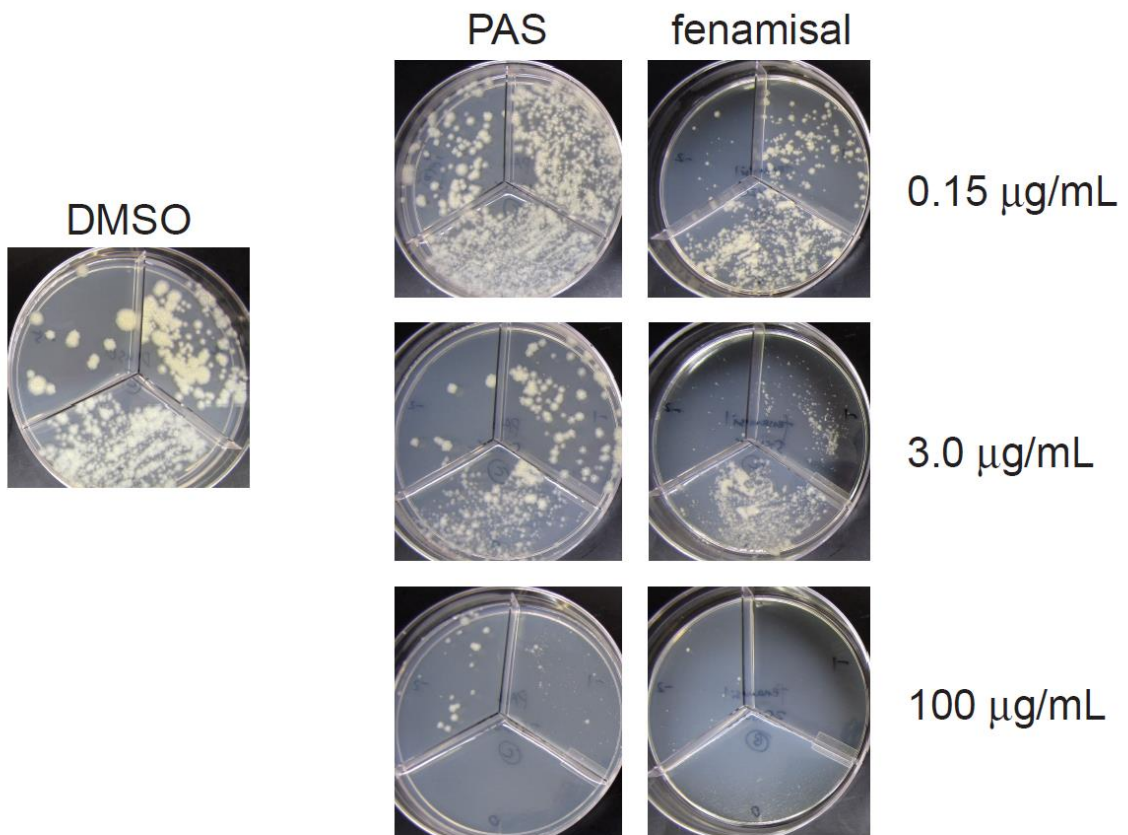

**Figure S5**

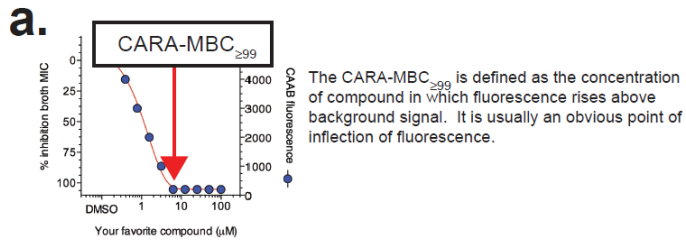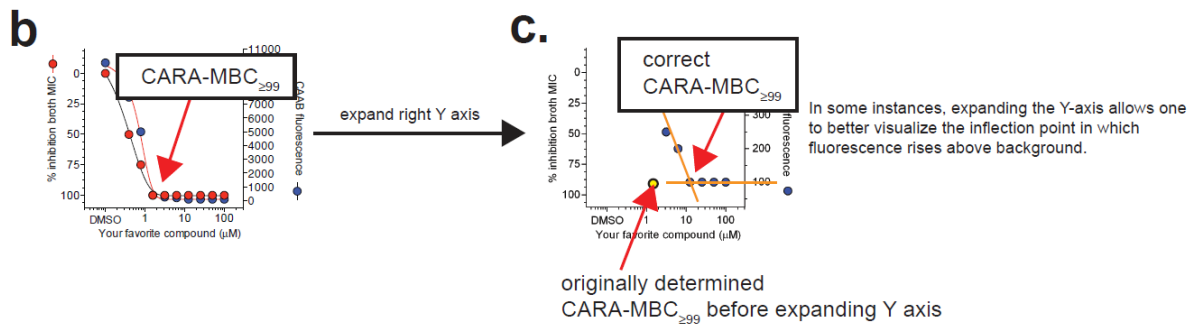

**Figure S6**

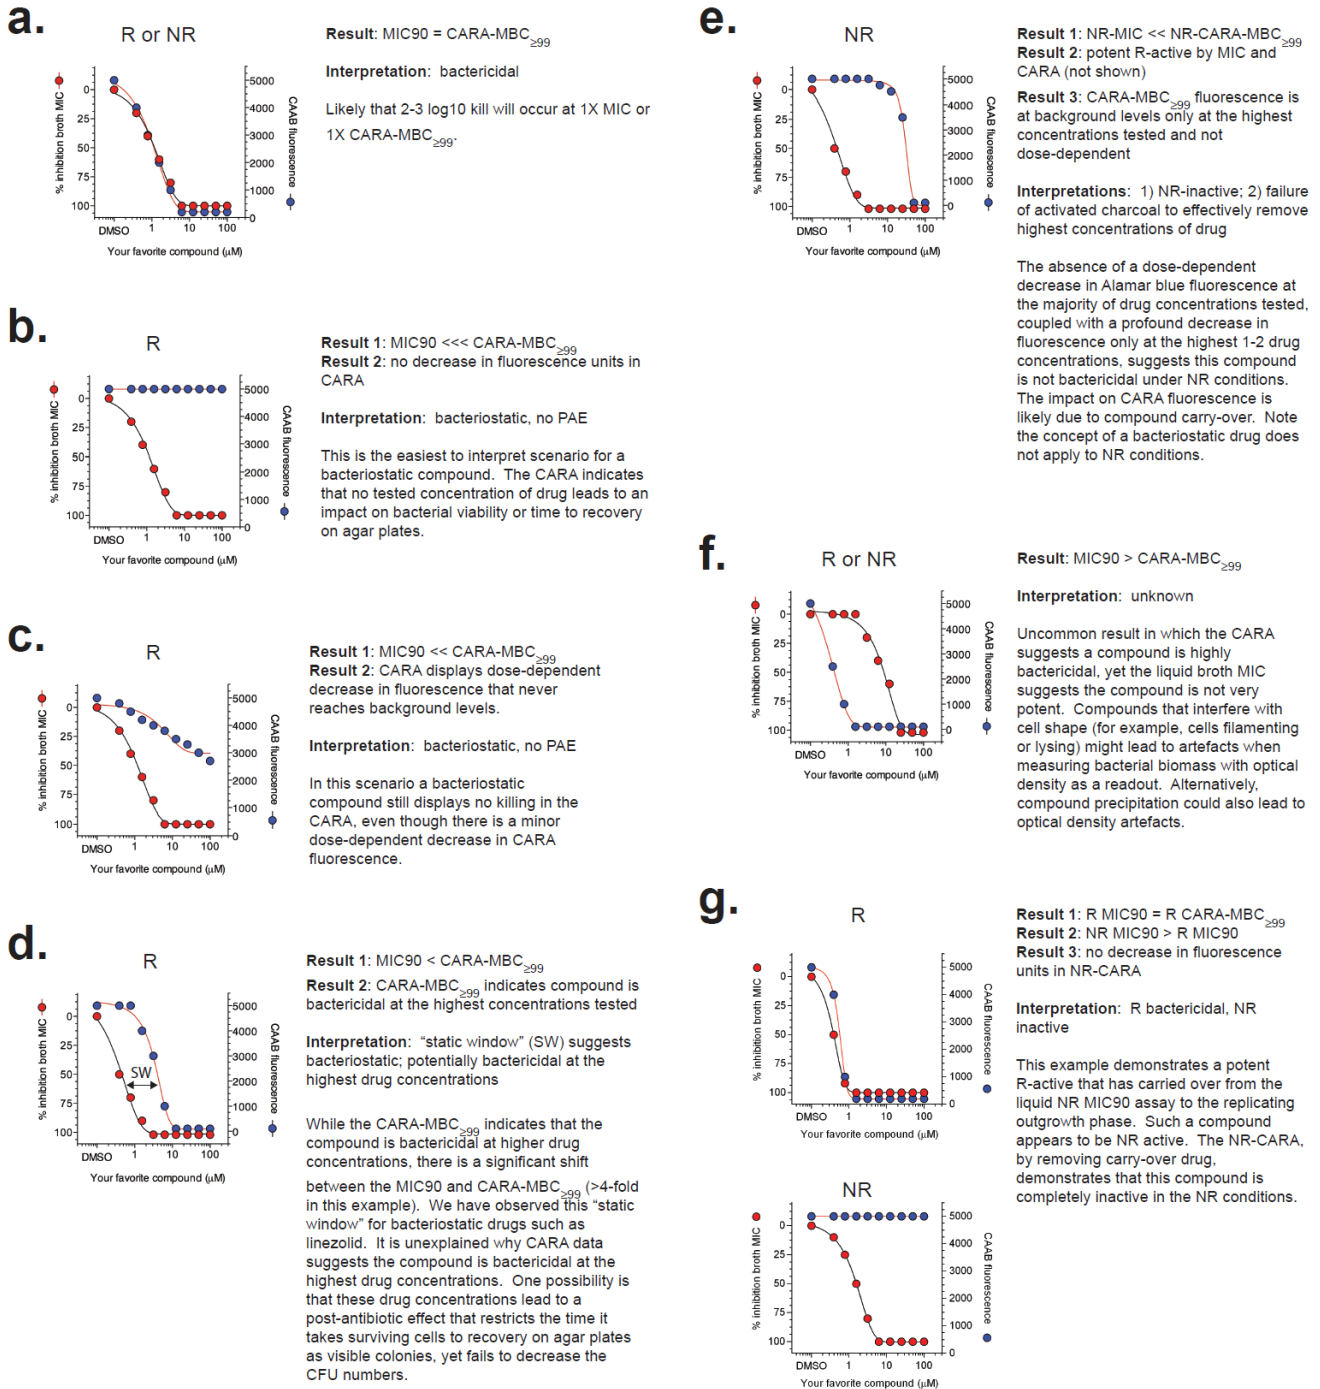

Supplement: AAC.00803-15_zac010154475so1.pdf [file AAC.00803-15_zac010154475so1.pdf]
